# Supplementary material for: Meta-Analysis on the Application Value of Collaborative Nursing in Postcolostomy Nursing of Patients with Colorectal Cancer
Source: Hindawi journal article supplement (doi:10.1155/2022/6940715), 2022-01-30
Supplement: f1 [file 6940715.f1.docx]

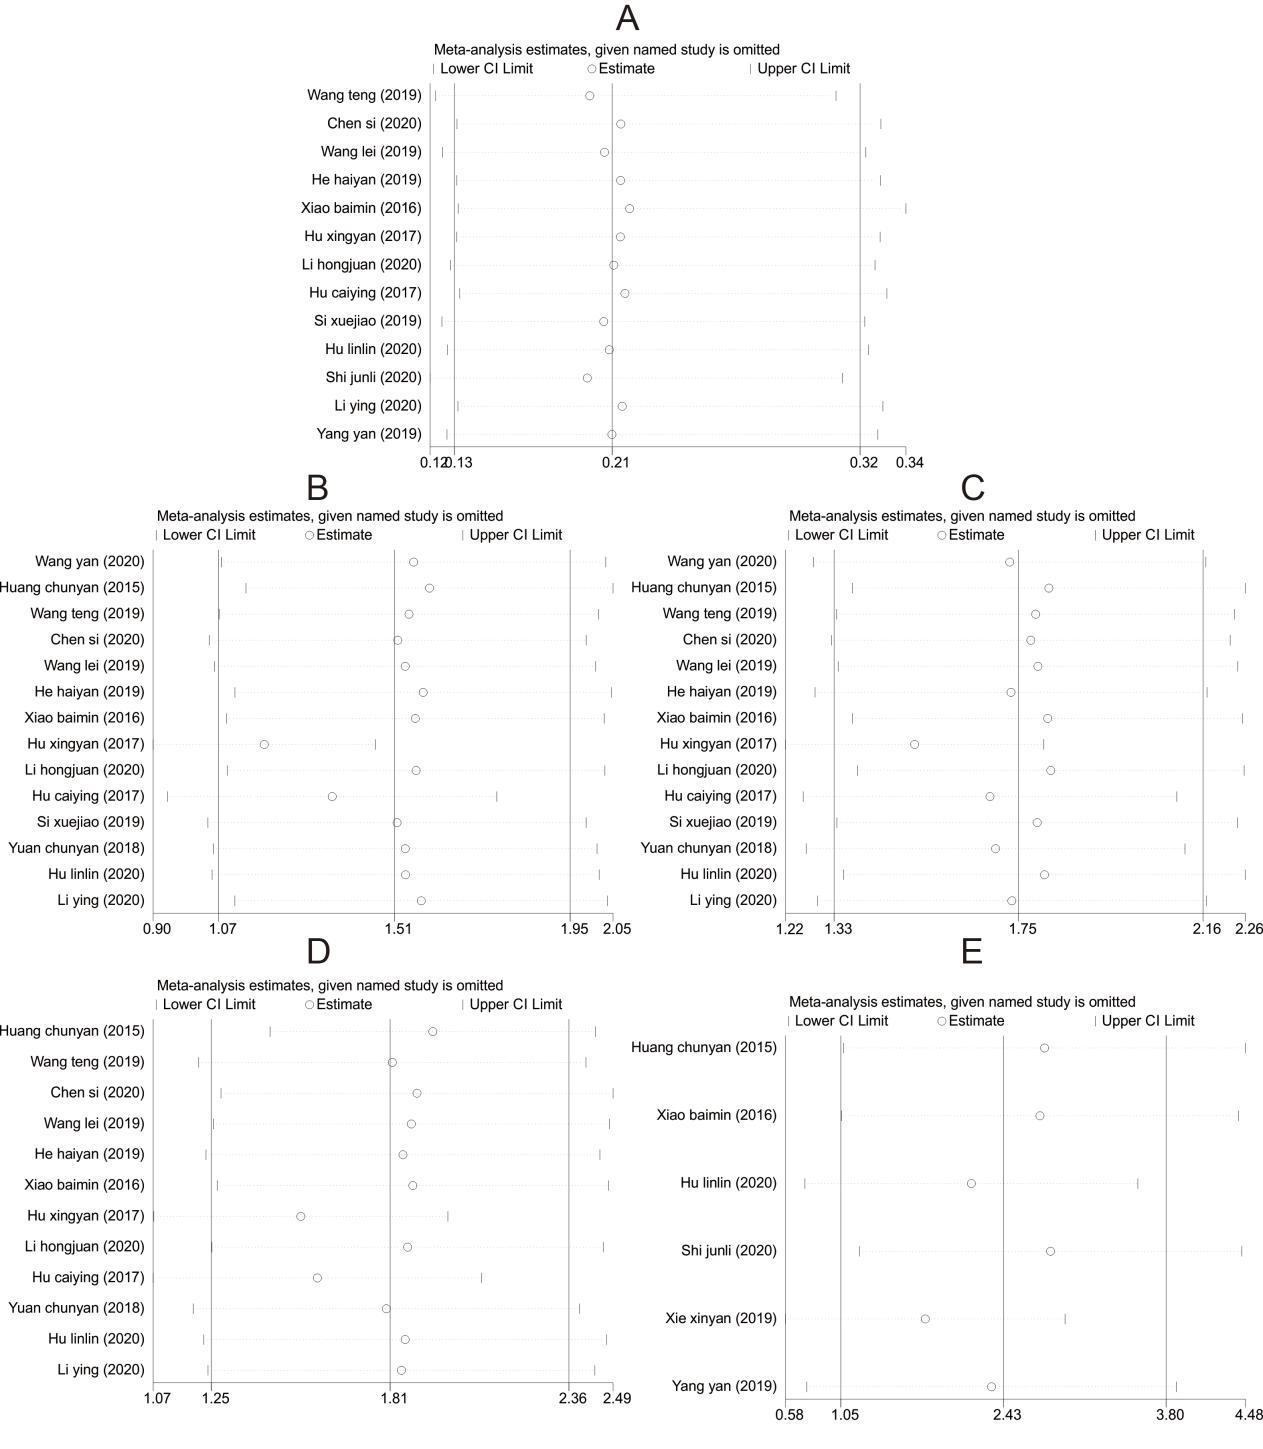


Supplementary Figure 1 Forest plot of baseline levels of each indicator (B: Concept of self-care before intervention; C: Self-care skills before intervention; D: Self-care responsibility before intervention; E: ESCA score before intervention)
